# Supplementary material
Source: PubMed Central journal article supplement (PMC8321428)
Supplement: mmc1.pdf [file mmc1.pdf]

# THE LANCET

## Infectious Diseases

### Supplementary appendix

This appendix formed part of the original submission. We post it as supplied by the authors.

Supplement to: Matthias Tenbusch, Sofie Schumacher, Emanuel Vogel, et al.  
Heterologous prime–boost vaccination with ChAdOx1 nCoV-19 and BNT162b2.  
*Lancet Infect Dis* 2021; published online July 29. [http://dx.doi.org/10.1016/S1473-3099\(21\)00420-5](http://dx.doi.org/10.1016/S1473-3099(21)00420-5).

## Supplementary Appendix

### Heterologous prime-boost vaccination with ChAdOx1 nCoV-19 and BNT162b2 mRNA

Matthias Tenbusch\*, Sofie Schumacher\*, Emanuel Vogel, Alina Priller, Jürgen Held, Philipp Steininger, Stephanie Beileke, Pascal Irrgang, Ronja Brockhoff, Jon Salmanton-García, Kathrin Tinnefeld, Hrvoje Mijocevic, Kilian Schober, Christian Bogdan, Sarah Yazici, Percy Knolle, Oliver A. Cornely#, Klaus Überla#, Ulrike Protzer#  
on behalf of the DZIF-Vaccelebrate-CoVaKo study team§

\*.#these authors contributed equally to the work

#### §Additional members of the DZIF-Vaccelebrate-CoVaKo study team

Hedwig Roggendorf, Otto Zelger, Catharina Christa, Samuel Jeske, Sarah Heringer, Rayya Alsalameh, Jan Esse, Jochen Mattner, Monika Wytopil.

Institute of Clinical and Molecular Virology, University Hospital Erlangen (MT, PS, PI, KÜ), and Mikrobiologisches Institut—Klinische Mikrobiologie, Immunologie und Hygiene (JH, KS, CB, RA, JE, JM, MW), Universitätsklinikum Erlangen Friedrich-Alexander-Universität (FAU) Erlangen-Nürnberg, Erlangen, Germany; University Hospital of Cologne, Faculty of Medicine, Department I of Internal Medicine, Cologne, Germany (SS, RB, JS-G, OAC, SH); University of Cologne, Translational Research, Cologne Excellence Cluster on Cellular Stress Responses in Aging-Associated Diseases, Cologne, Germany (SS, RB, JS-G, OAC, SH); Institute of Virology, School of Medicine, Technical University of Munich/Helmholtz Zentrum München, 81675 Munich, Germany (EV, KT, HM, UP, SJ); Institute of Molecular Immunology and Experimental Oncology, School of Medicine, University Hospital rechts der Isar, Technical University of Munich, Munich, Germany (AP, SY, PK, HR, OZ, CC); German Center for Infection Research (DZIF), partner sites Munich and Cologne (PK, OHC, UP)

#### Table of contents:

1. Supplementary Table S1: Characteristics of cohorts analyzed in laboratory 1 (Munich, Germany)
2. Characteristics of cohorts analyzed in laboratory 1 (Munich, Germany)

3. Supplementary Table S2: Characteristics of cohorts analyzed in laboratory 2 (Erlangen, Germany)
4. Characteristics of cohorts analyzed in laboratory 2 (Erlangen, Germany)
5. Supplementary Figure S1: Correlation of the surrogate neutralizing antibody assay and a cell-culture based infection inhibition assay using SARS-CoV-2 wild-type
6. Ethics statement
7. Funding statement
8. Acknowledgements

**1. Table S1. Characteristics of cohorts analyzed in laboratory 1 (Munich, Germany)**

|                                                                        | <b>ChAdOx1 nCoV-19 prime,<br/>BNT162b2 mRNA boost<br/>CGN N = 183; MUC N = 49;<br/>total N = 232</b> | <b>BNT162b2 mRNA prime,<br/>BNT162b2 mRNA boost<br/>MUC N = 410</b> |
|------------------------------------------------------------------------|------------------------------------------------------------------------------------------------------|---------------------------------------------------------------------|
| Volunteer source                                                       | General population at vaccination center                                                             | Healthcare workers                                                  |
| Age in years, median (IQR) [range]                                     | 47 (33-55) [18-65]                                                                                   | 38 (31-48) [20-78]                                                  |
| Sex, n (%) Female                                                      | 190 (81.9%)                                                                                          | 248 (60.5%)                                                         |
| Sex, n (%) Male                                                        | 42 (18.1%)                                                                                           | 162 (39.5%)                                                         |
| Time from prime to boost dose in days, median (IQR) [range]            | 63 (63-77) [54-85]                                                                                   | 21 (21-22) [18-25]                                                  |
| Time from boost dose to blood collection in days, median (IQR) [range] | 14 (13-15) [13-15]                                                                                   | 14 (13-15) [9-62]                                                   |

CGN, Cologne; MUC, Munich; IQR: interquartile range.

**2. Characteristics of cohorts analyzed in laboratory 1 (Munich, Germany)**

To evaluate standard mRNA vaccination, employees of the University Hospital rechts der Isar of the Technical University of Munich were offered to have their antibody responses to SARS-CoV-2 analyzed after vaccination with two doses of BNT162b2 mRNA. Persons with known or accidentally detected prior SARS-CoV-2 infection were excluded. Serum samples obtained from 410 persons at the time of booster vaccination and 14±1 day after the second vaccination were analyzed.

Given the uncertain immunogenicity of heterologous prime boost vaccinations, 232 vaccinees, who received a first vaccination with ChAdOx1 nCoV-19 and - according to current recommendation in Germany - a booster vaccination with BNT162b2 mRNA at the vaccination center in Cologne or in Munich, Germany, were offered to register for blood sampling appointments at the day of booster vaccination with BNT162b2 mRNA and 13 to 15 days after the second vaccination. Information on age, sex, and dates of first and second vaccination were obtained. A summary of the characteristics of the different groups of vaccinees is shown in Table S1.

### 3. Table S2. Characteristics of cohorts analyzed by laboratory 2.

|                                                                        | BNT162b2 mRNA prime,<br>BNT162b2 mRNA boost<br><br>ERL N = 127 | ChAdOx1 nCoV-19 prime,<br>ChAdOx1 nCoV-19 boost<br><br>ERL N = 66 | ChAdOx1 nCoV-19 prime,<br>BNT162b2 mRNA boost<br><br>ERL N = 250 |
|------------------------------------------------------------------------|----------------------------------------------------------------|-------------------------------------------------------------------|------------------------------------------------------------------|
| Volunteer source                                                       | Healthcare workers                                             | General population at vaccination center                          | General population at vaccination center                         |
| Age in years, median (IQR) [range]                                     | 41 (27-52) [20-65]                                             | 57 (45-62) [31-64]                                                | 52 (31-59) [19-59]                                               |
| Sex, n (%) Female                                                      | 90 (70.87%)                                                    | 43 (65.2%)                                                        | 160 (64.0%)                                                      |
| Sex, n (%) Male                                                        | 37 (29.13%)                                                    | 23 (34.8%)                                                        | 90 (36.0%)                                                       |
| Time from prime to boost dose in days, median (IQR) [range]            | 23 (21-25) [14-29] *                                           | 63 (63-63) [63-63]                                                | 63 (63-63) [57-71]                                               |
| Time from boost dose to blood collection in days, median (IQR) [range] | 14 (14) [10-21]                                                | 15 (13-15) [13-16]                                                | 14 (13-15) [6-21]                                                |

ERL, Erlangen; IQR: interquartile range.; n\* data available for 126 out of 127 volunteers

### 4. Characteristics of cohorts analyzed in laboratory 2 (Erlangen, Germany)

Healthcare workers were offered analysis of their neutralizing antibody responses to SARS-CoV-2 two to three weeks after the second BNT162b2 mRNA vaccination. Given the uncertain immunogenicity of heterologous prime boost vaccinations, recipients of a priming vaccination with ChAdOx1 nCoV-19, who had received a second vaccination with ChAdOx1 nCoV-19 or BNT162b2 mRNA on April 29<sup>th</sup>, 2021, at the public vaccination center in Erlangen were offered to register by phone for blood sampling appointments 14 to 16 days after the second vaccination. Blood samples and information on age, sex, and dates of first and second vaccination were obtained from 316 volunteers (for Summary see Table S2). Volunteers reporting prior SARS-CoV-2 infection were excluded.

## 5. Supplementary Figures.

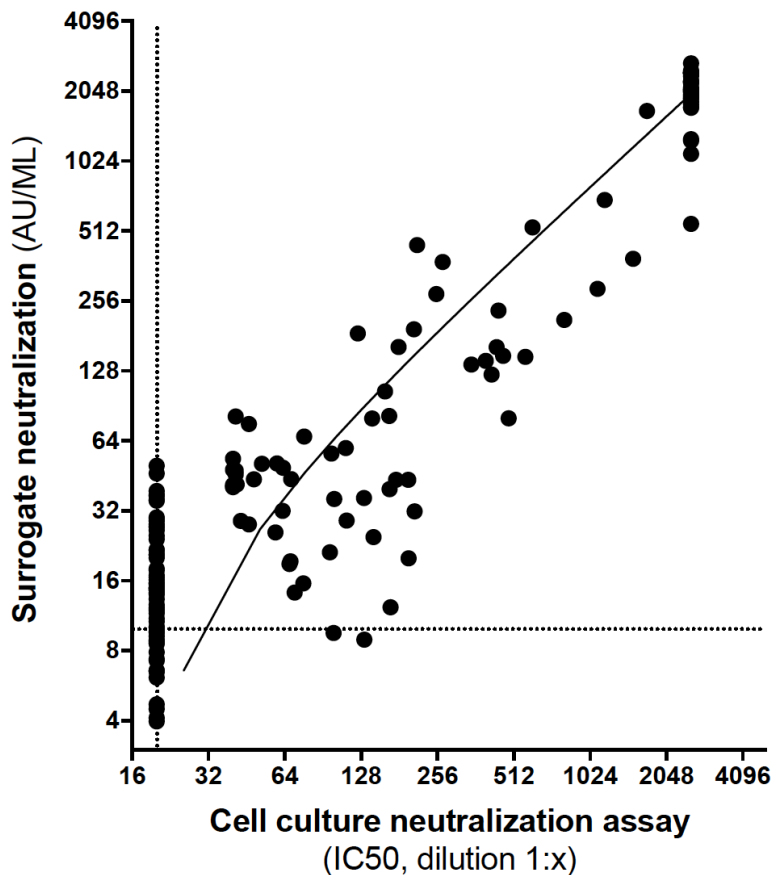

**Figure S1: Correlation of the surrogate neutralizing antibody assay and a cell-culture based SARS-CoV-2 infection inhibition assay.** 220 sera obtained from COVID-19 convalescent or vaccinated donors were analyzed 1) in a cell-culture based assay using SARS-CoV-2 wild-type and 2) in a competitive chemo-luminescence immunoassay (iFlash-2019-nCoV NAb assay, Yhlo, Shenzhen, China). The surrogate neutralization assay detects antibodies that are able to compete with binding of a recombinant extracellular domain of the SARS-CoV-2 receptor ACE2 to a recombinant receptor-binding domain of the SARS-CoV-2 S1 protein coated on microparticles and thus indicates the neutralization activity of sera. Activity is determined in arbitrary units (AU). Cut-off is 10 AU/ml, indicated by the horizontal dotted line. For the cell-culture assay, Vero E6 cells were infected with SARS-CoV-2 (Wuhan strain, D614G variant) at a multiplicity of infection of 0.06 incubated with test sera in a serial 2-fold dilution from 1:20 to 1:2560. Lowest dilution (1:20) is indicated by the vertical dotted line. After 24 hours, cells were fixed for an in-cell ELISA using anti-dsRNA J2 antibody (Jena Bioscience, Jena, Germany) to detect SARS-CoV-2 infection. Using the resulting inhibition curve, the inhibitory 50% concentration (IC<sub>50</sub>) given as dilution 1:x was determined. All positive values obtained are plotted. Simple linear regression analysis revealed a slope of 0.7863 (0.7542 to 0.8135) and an R squared of 0.9256 being significantly non-zero ( $p < 0.0001$ ). To ensure cell survival, an initial 1:20 dilution of serum had to be used precluding calculation of IC<sub>50</sub> if serum neutralization activity is low. The surrogate neutralization assay, in contrast, was done with undiluted serum and therefore allowed a quantification also when serum neutralization activity was low.

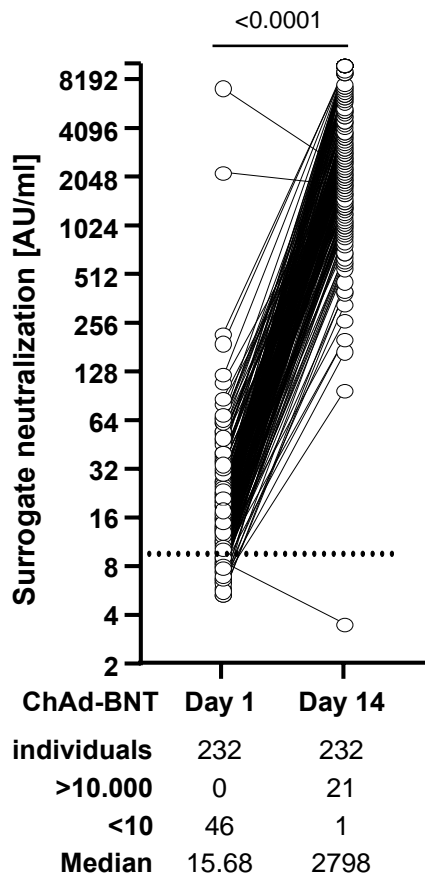

**Figure S2. Comparison of surrogate neutralization activity following ChAdOx1 nCoV-19 prime and BNT162b2 mRNA (BNT) boost vaccination.** Vaccinees received one dose of the ChAdOx1 nCoV-19 (ChAd) vaccine and, with few exceptions, 9 weeks later a BNT162b2 mRNA (BNT) boost vaccination (for details see Suppl. Table S1). In all vaccinees, serum samples were obtained at the day of boost vaccination and at day 14±1 after the heterologous booster. Surrogate neutralization activity is given in paired samples for each individual. Dots represent single vaccinees. P values from a two-tailed Wilcoxon matched-pairs signed rank test are shown above the graph. Descriptive statistics shown below the graph include numbers of individuals for which results are given, numbers of results below the lower (<10) and above the upper (>10.000) cut-off of the surrogate neutralization assay and median values.

## **6. Ethics Statement**

The retrospective analysis plan on the comparison of the SARS-CoV-2 antibody levels in response to different vaccine regimens was approved by the local ethics committees in Erlangen (Az. 202\_21 Bc) and Munich (Az. 26/21 und Az. 330/21 S).

## **7. Funding Statement**

Funded by the German Centre for Infection Research (DZIF), the European Union's "Horizon 2020 Research and Innovation Programme" under grant agreement No. 101037867 (VACCELERATE), the "Bayerisches Staatsministerium für Wissenschaft und Kunst" for the CoVaKo-2021 and the For-COVID projects and the Helmholtz Association via the collaborative research program "CoViPa". Further support was obtained from the Federal Ministry of Education and Science (BMBF) through the "Netzwerk Universitätsmedizin", project "B-Fast", and the Bavarian Research Foundation via project "CoV-Rapid".

## **8. Acknowledgements**

We thank Thomas Wochmig, Anna-Marja Jetzlsperger, Philip Hagen, Kirsten Fraedrich for and Norbert Donhauser, excellent technical assistance. We are grateful to Martina Rupp, Oana Wehrmann and Nives Schwerdtner for their help in arranging the appointments for the vaccinees and setting up the blood sampling site at the Microbiology Institute in Erlangen and to all medical doctoral students for their assistance.
